# Supplementary material for: Theoretical exploration on the performance of single and dual-atom Cu catalysts on the CO2 electroreduction process: a DFT study
Source: Royal Society of Chemistry journal article supplement (doi:10.1039/d3cp02403b), 2023-01-01
Supplement: d3cp02403b1.pdf [file d3cp02403b1.pdf]

## Supporting Information

### Supplementary Figures

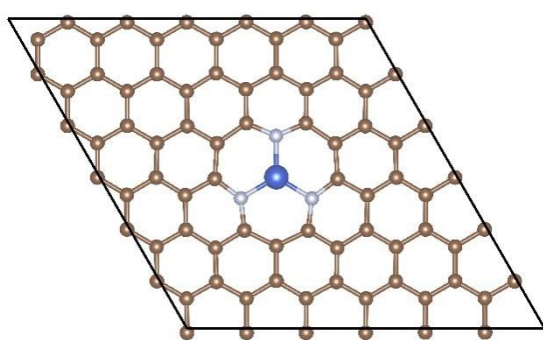

(a)

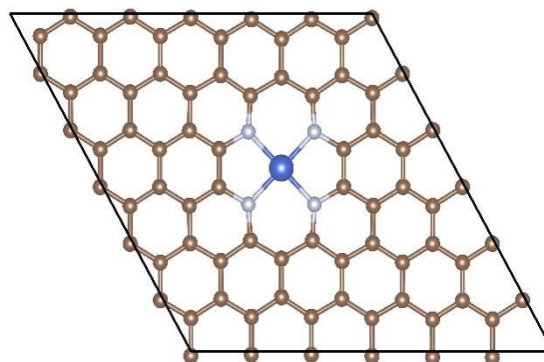

(b)

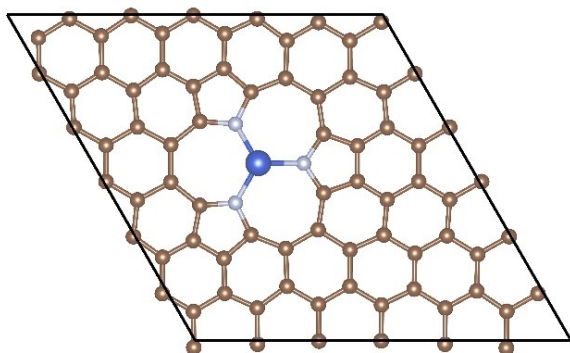

(c)

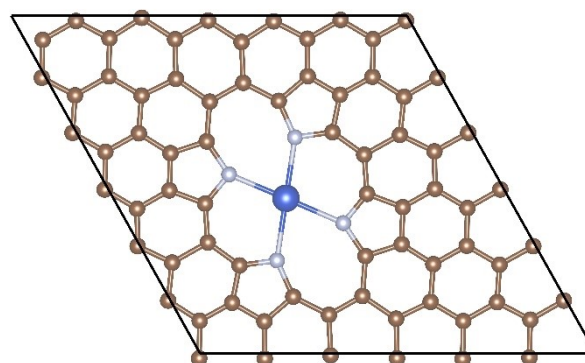

(d)

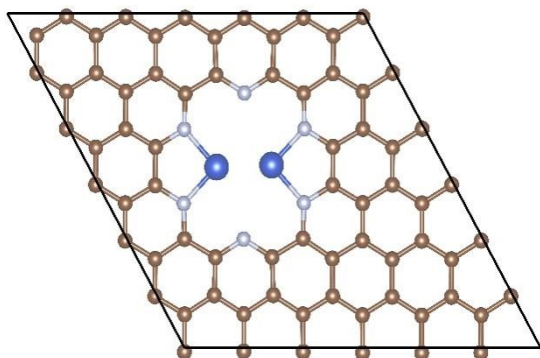

(e)

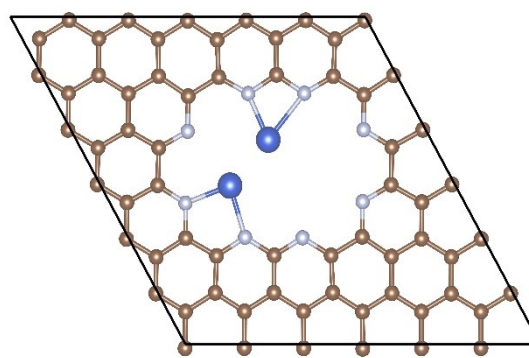

(f)

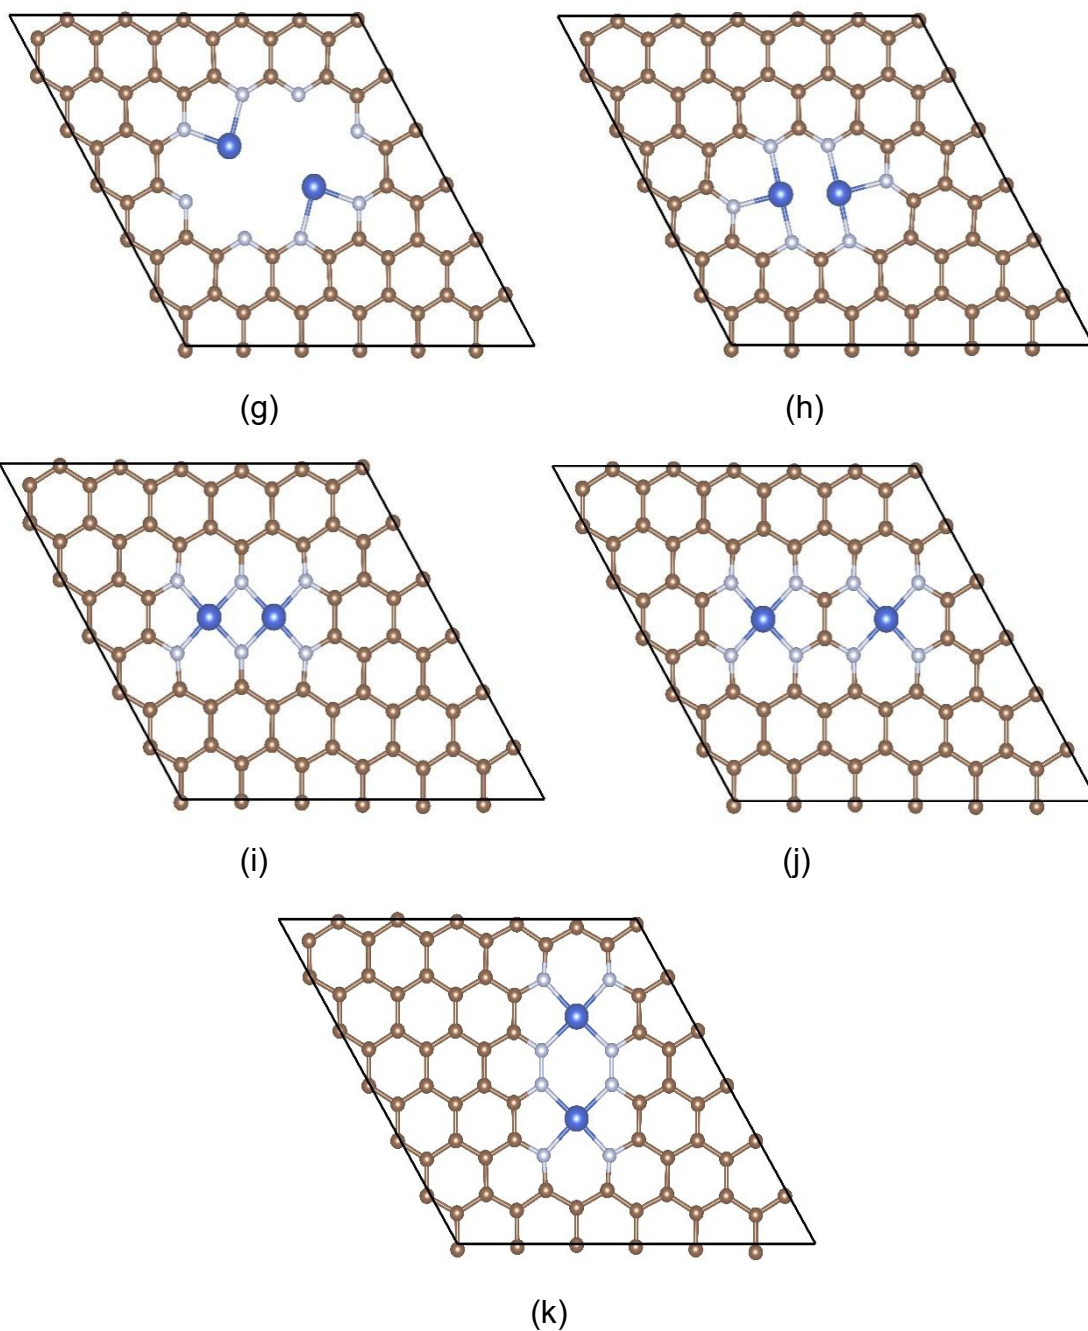

**Supplementary Figure 1** Optimized SACs and DACs configurations (brown: C; blue: Cu; gray: N). (a) CuNC-3-pyridine. (b) CuNC-4-pyridine. (c) CuNC-3-pyrrole. (d) CuNC-4-pyrrole. (e) CuCu-NC-2a. (f) CuCu-NC-2b. (g) CuCu-NC-2c. (h) CuCuNC-3. (i) CuCuNC-4a. (j) CuCuNC-4b. (k) CuCuNC-4c (brown: C; blue: Cu; gray: N).

**Top view**

**Top view**

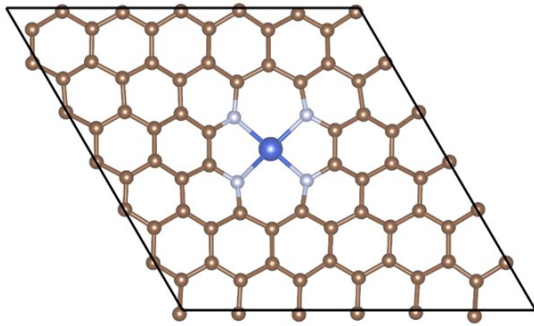

Side view

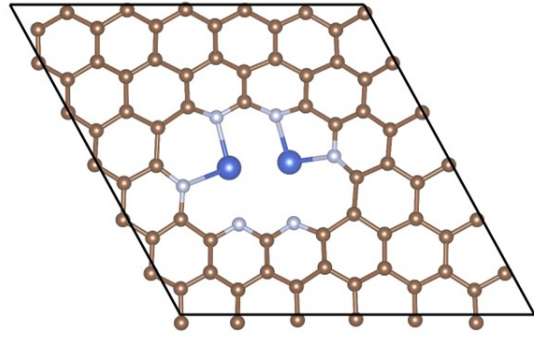

Side view

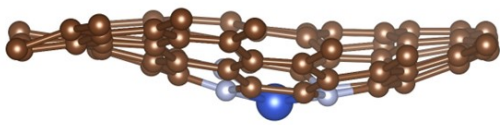

(a)

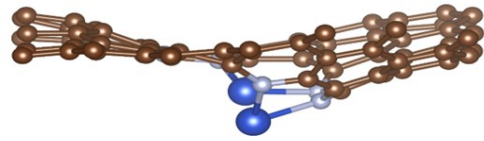

(b)

Top view

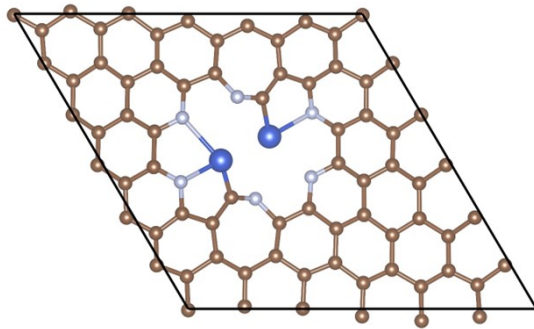

Side view

Top view

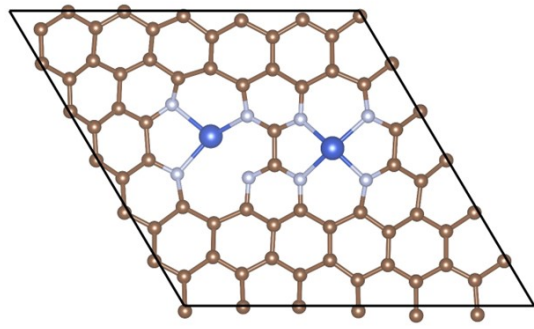

Side view

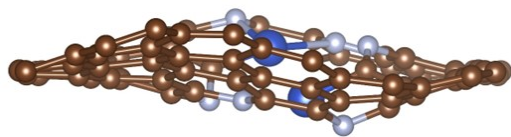

(c)

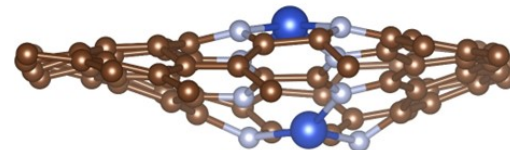

(d)

Top view

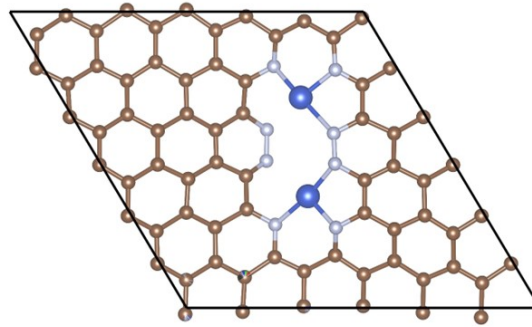

Side view

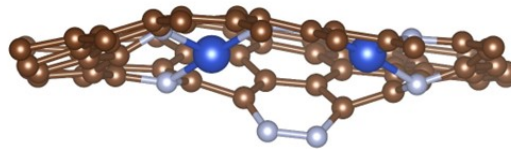

(e)

**Supplementary Figure 2** Structures of (a) CuNC-4-pyridine, (b) CuCuNC-3, (c) CuCuNC-4a, (d) CuCuNC-4b and (e) CuCuNC-4c after 300K AIMD simulations for 10 ps (brown: C; blue: Cu; gray: N).

**a**

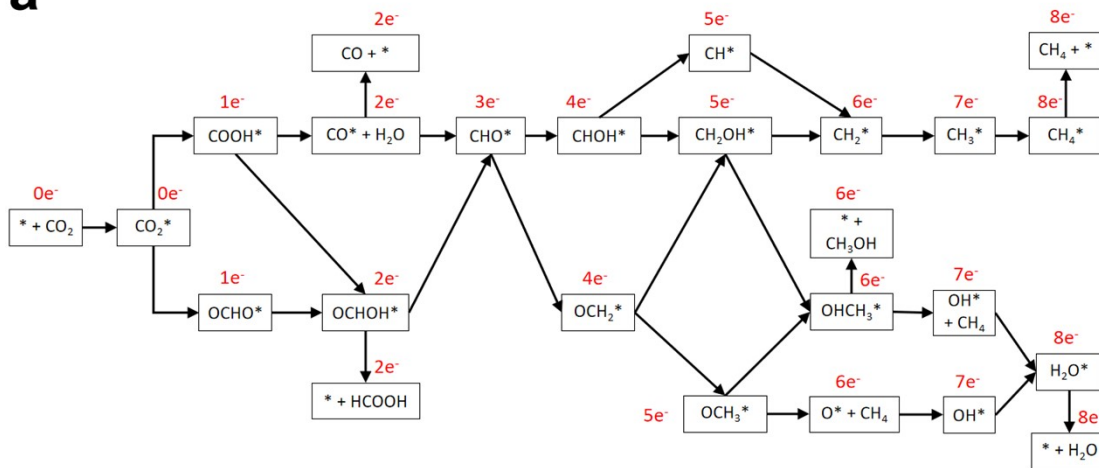

**b**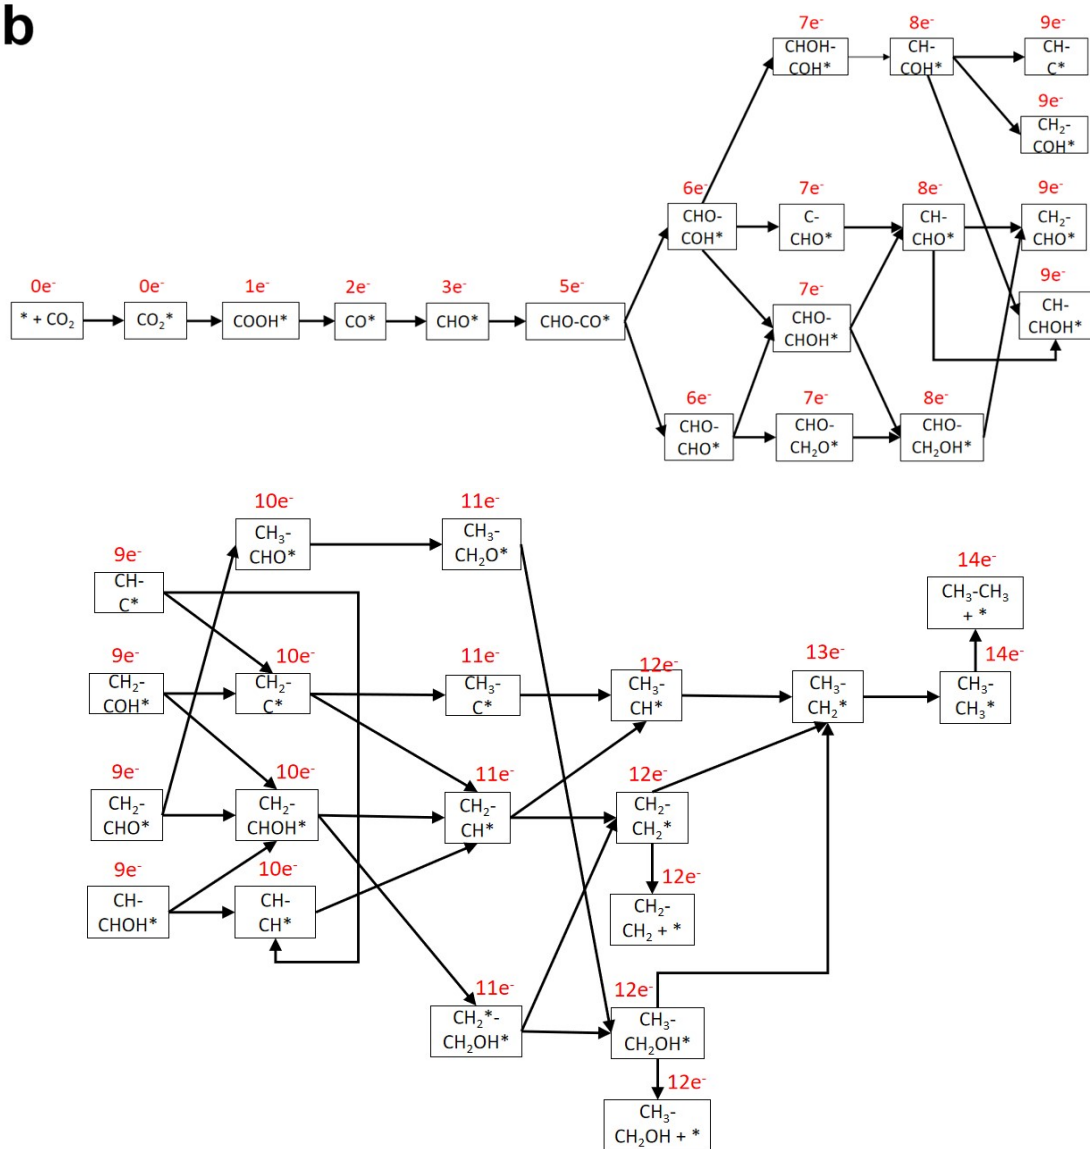

**Supplementary Figure 3** Possible pathways for CO<sub>2</sub> electroreduction to (a) C<sub>1</sub> and (b) C<sub>2</sub> products on CuNC-4-pyridine. "\*" means the catalyst. More details on elementary steps are listed in Table S2. The numbers in the graph represent the number of electrons transferred.

**a**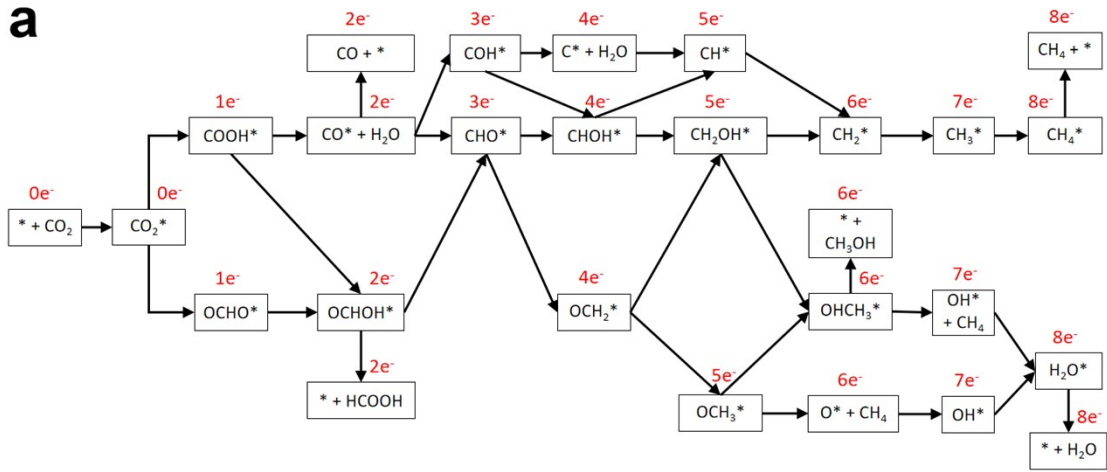**b**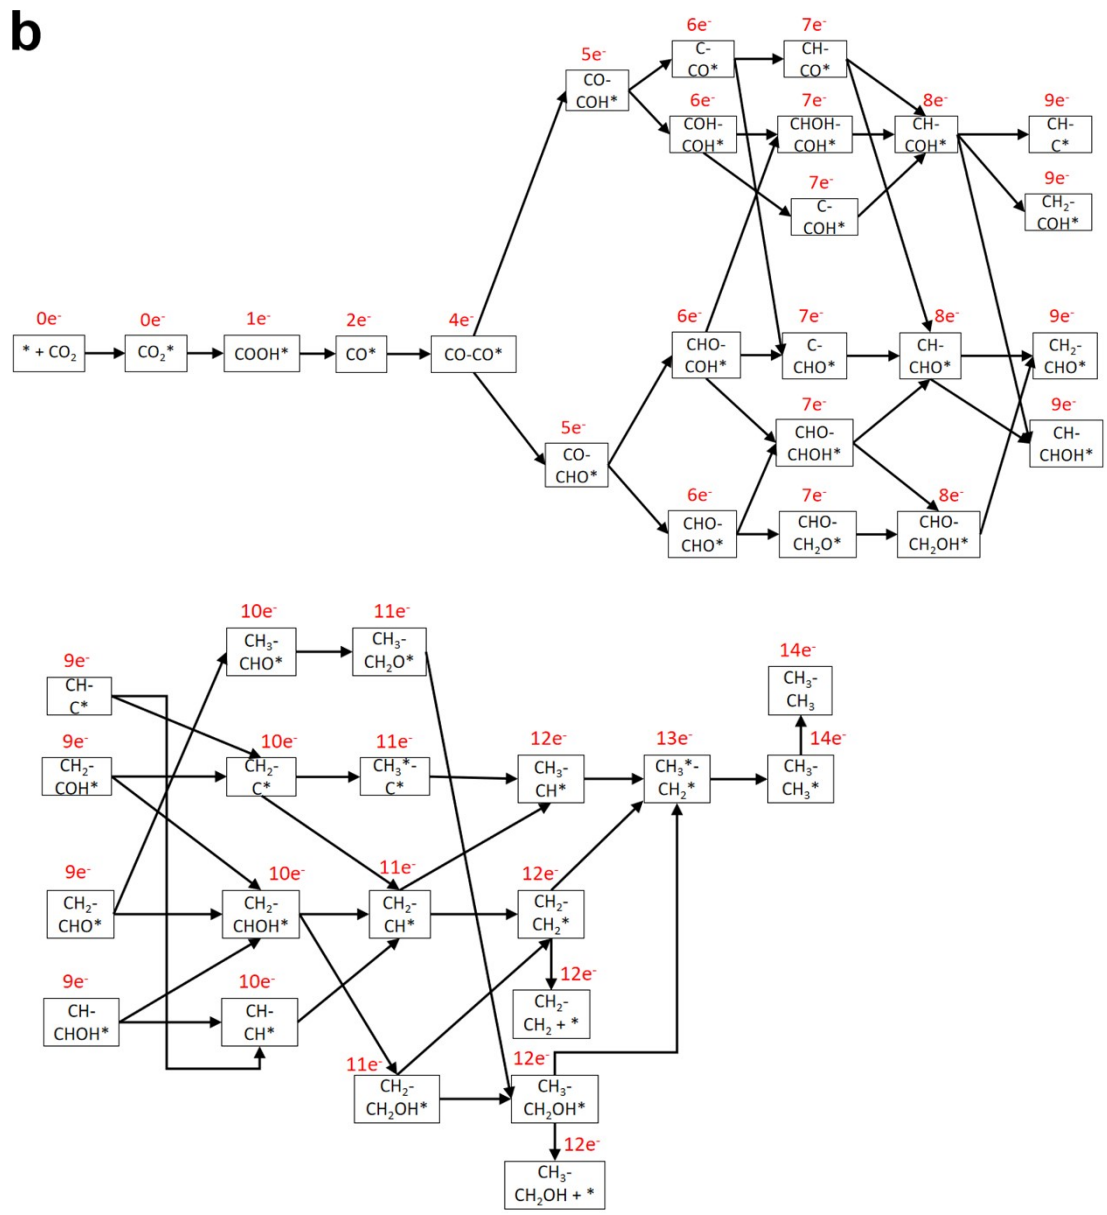

**Supplementary Figure 4** Possible pathways for CO<sub>2</sub> electroreduction to (a) C<sub>1</sub> and (b) C<sub>2</sub> products on CuCuNC-4a. "\*" means the catalyst. More details on elementary steps are listed in Table S3. The numbers in the graph represent the number of electrons transferred.

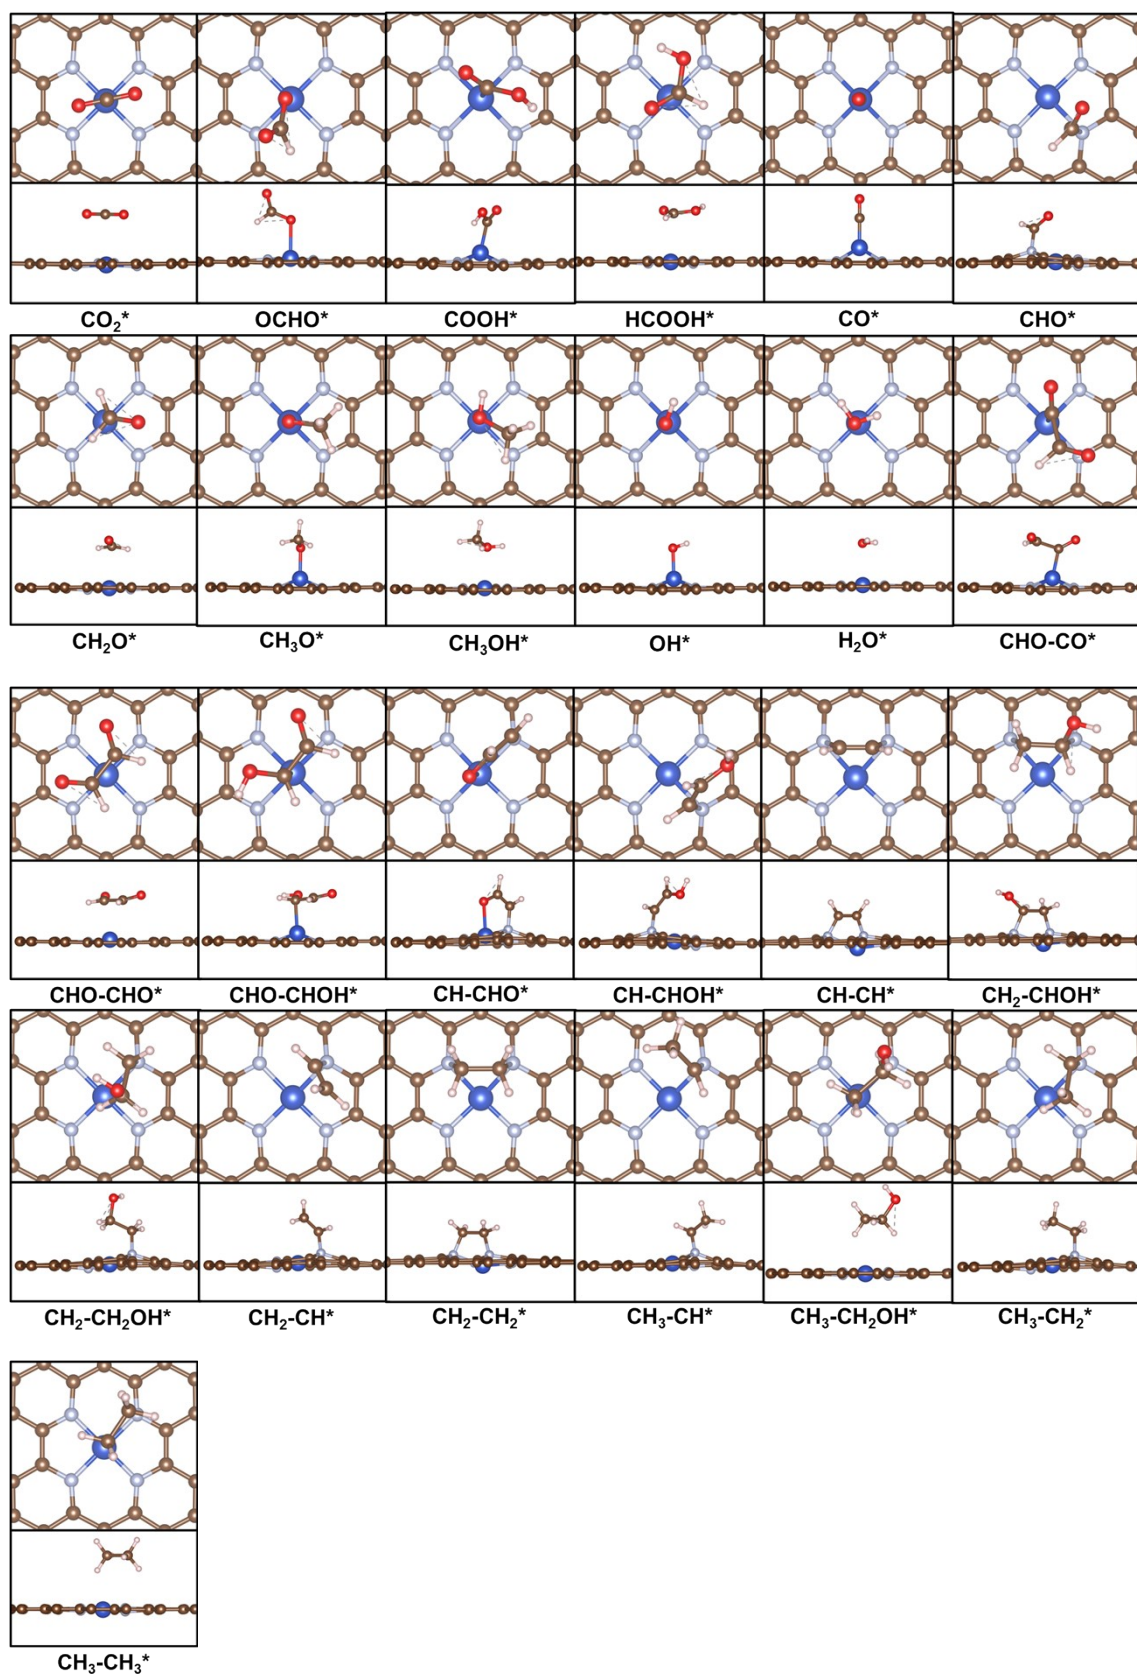

**Supplementary Figure 5** Optimized intermediates for  $\text{CO}_2$  electroreduction on CuNC-4-pyridine site (brown: C; blue: Cu; gray: N; red: O; white: H).



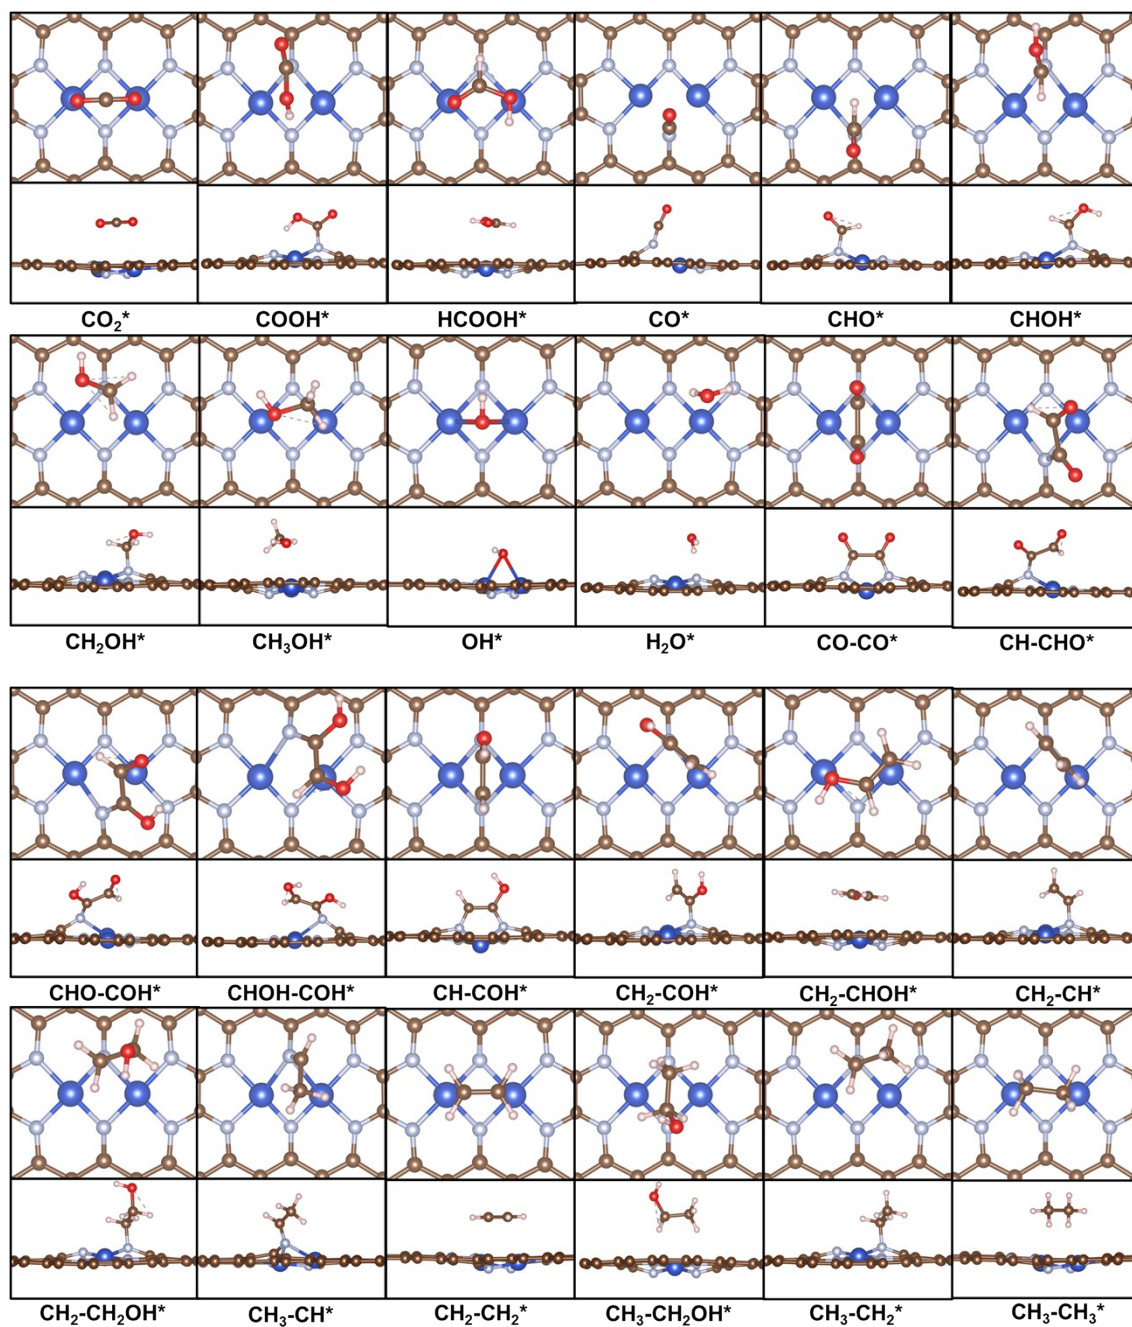

**Supplementary Figure 6** Optimized intermediates for  $\text{CO}_2$  electroreduction on CuCuNC-4a site (brown: C; blue: Cu; gray: N; red: O; white: H).

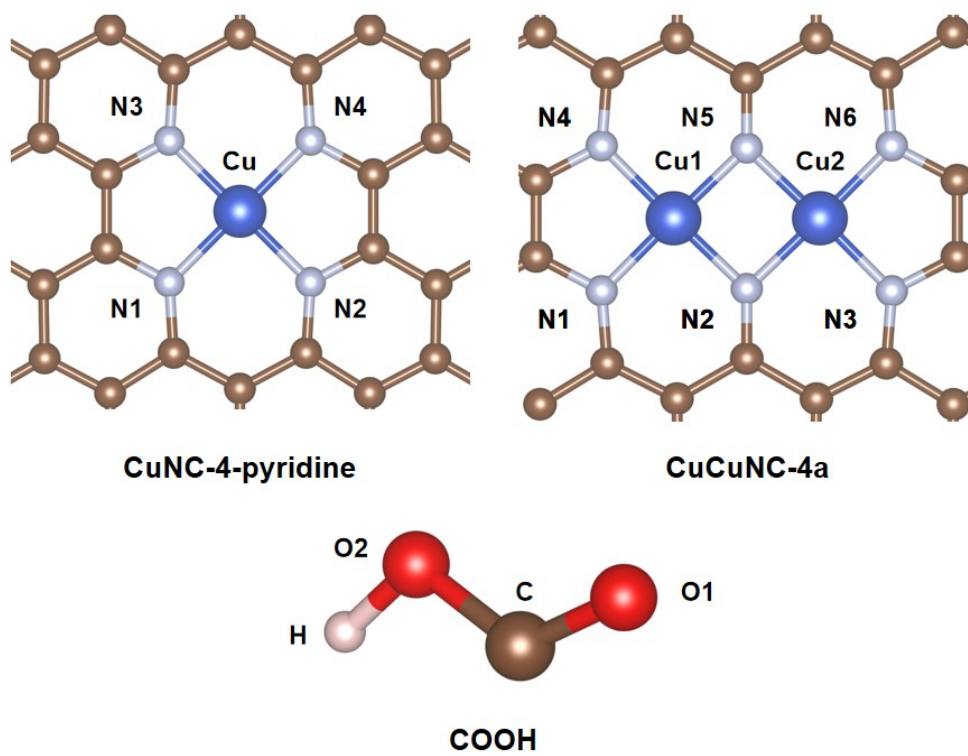

**Supplementary Figure 7** Position numbers of C, N, Cu, O and H atoms on CuNC-4-pyridine and CuCuNC-4a and COOH.

## Supplementary Tables

**Supplementary Table 1** Bader charge transfer of Cu, N, O and H atoms in CuNC-4-pyridine and CuCuNC-4a with and without adsorbed COOH.

| Bader charge<br>( e ) | CuNC-4-<br>pyridine | CuNC-4-pyridine-<br>COOH | CuCuNC-4a | CuCuNC-4a-<br>COOH |
|-----------------------|---------------------|--------------------------|-----------|--------------------|
| <b>Cu1</b>            | -0.96               | -0.87                    | -0.97     | -0.91              |
| <b>Cu2</b>            | -                   | -                        | -0.97     | -0.92              |
| <b>N1</b>             | 1.17                | 1.20                     | 1.18      | 1.23               |
| <b>N2</b>             | 1.29                | 1.21                     | 1.13      | 1.17               |
| <b>N3</b>             | 1.30                | 1.19                     | 1.25      | 1.25               |
| <b>N4</b>             | 1.25                | 1.24                     | 1.27      | 1.23               |
| <b>N5</b>             | -                   | -                        | 1.17      | 1.24               |
| <b>N6</b>             | -                   | -                        | 1.21      | 1.20               |
| <b>C</b>              | -                   | -1.26                    | -         | -1.93              |
| <b>O1</b>             | -                   | 1.17                     | -         | 1.19               |
| <b>O2</b>             | -                   | 1.14                     | -         | 1.16               |
| <b>H</b>              | -                   | -0.65                    | -         | -0.62              |

**Supplementary Table 2** Free energies for elementary steps in possible pathways for CO<sub>2</sub> electroreduction to (a) C<sub>1</sub> and (b) C<sub>2</sub> products on CuNC-4-pyridine. “\*” means the catalyst.

| Step Index | Reaction                                                                                     | Reaction Free Energy |
|------------|----------------------------------------------------------------------------------------------|----------------------|
| 1          | * + CO <sub>2</sub> + H <sup>+</sup> + e <sup>-</sup> → COOH*                                | 1.39                 |
| 2          | COOH* + H <sup>+</sup> + e <sup>-</sup> → CO* + H <sub>2</sub> O                             | -0.88                |
| 3          | CO* → CO + *                                                                                 | -0.30                |
| 4          | CO* + H <sup>+</sup> + e <sup>-</sup> → CHO*                                                 | 0.71                 |
| 5          | CHO* + H <sup>+</sup> + e <sup>-</sup> → CHOH*                                               | 0.79                 |
| 6          | CHOH* + H <sup>+</sup> + e <sup>-</sup> → CH* + H <sub>2</sub> O                             | 0.26                 |
| 7          | CHOH* + H <sup>+</sup> + e <sup>-</sup> → CH <sub>2</sub> OH*                                | -0.95                |
| 8          | CH* + H <sup>+</sup> + e <sup>-</sup> → CH <sub>2</sub> *                                    | -1.27                |
| 9          | CH <sub>2</sub> OH* + H <sup>+</sup> + e <sup>-</sup> → CH <sub>2</sub> * + H <sub>2</sub> O | -0.05                |
| 10         | CH <sub>2</sub> * + H <sup>+</sup> + e <sup>-</sup> → CH <sub>3</sub> *                      | -0.95                |
| 11         | CH <sub>3</sub> * + H <sup>+</sup> + e <sup>-</sup> → CH <sub>4</sub> + *                    | -1.41                |
| 12         | * + CO <sub>2</sub> + H <sup>+</sup> + e <sup>-</sup> → OCHO*                                | 0.77                 |

|    |                                                                                                              |       |
|----|--------------------------------------------------------------------------------------------------------------|-------|
| 13 | $\text{OCHO}^* + \text{H}^+ + \text{e}^- \rightarrow \text{HCOOH}^*$                                         | -0.23 |
| 14 | $\text{HCOOH}^* \rightarrow \text{HCOOH} + ^*$                                                               | -0.20 |
| 15 | $\text{OCHOH}^* + \text{H}^+ + \text{e}^- \rightarrow \text{CHO}^* + \text{H}_2\text{O}$                     | 0.68  |
| 16 | $\text{CHO}^* + \text{H}^+ + \text{e}^- \rightarrow \text{CH}_2\text{O}^*$                                   | -0.68 |
| 17 | $\text{CH}_2\text{O}^* + \text{H}^+ + \text{e}^- \rightarrow \text{CH}_3\text{O}^*$                          | 0.47  |
| 18 | $\text{CH}_2\text{O}^* + \text{H}^+ + \text{e}^- \rightarrow \text{CH}_2\text{OH}^*$                         | 0.52  |
| 19 | $\text{CH}_3\text{O}^* + \text{H}^+ + \text{e}^- \rightarrow \text{CH}_3\text{OH}^*$                         | -0.98 |
| 20 | $\text{CH}_3\text{OH}^* \rightarrow \text{CH}_3\text{OH} + ^*$                                               | -0.13 |
| 21 | $\text{CH}_2\text{OH}^* + \text{H}^+ + \text{e}^- \rightarrow \text{CH}_3\text{OH}^*$                        | -1.03 |
| 22 | $\text{CH}_3\text{OH}^* + \text{H}^+ + \text{e}^- \rightarrow \text{OH}^* + \text{CH}_4$                     | 0.14  |
| 23 | $\text{OH}^* + \text{H}^+ + \text{e}^- \rightarrow \text{H}_2\text{O} + ^*$                                  | -1.53 |
| 24 | $\text{CH}_3\text{O}^* + \text{H}^+ + \text{e}^- \rightarrow \text{O}^* + \text{CH}_4$                       | 1.27  |
| 25 | $\text{O}^* + \text{H}^+ + \text{e}^- \rightarrow \text{OH}^*$                                               | -2.10 |
| 26 | $\text{COOH}^* + \text{H}^+ + \text{e}^- \rightarrow \text{OCHOH}^*$                                         | -0.85 |
| 27 | $\text{CH}_3^* + \text{H}^+ + \text{e}^- \rightarrow \text{CH}_4^*$                                          | -1.40 |
| 28 | $\text{CH}_4^* \rightarrow \text{CH}_4 + ^*$                                                                 | -0.01 |
| 29 | $\text{OH}^* + \text{H}^+ + \text{e}^- \rightarrow \text{H}_2\text{O}^*$                                     | -1.11 |
| 30 | $\text{H}_2\text{O}^* \rightarrow \text{H}_2\text{O} + ^*$                                                   | -0.41 |
| 31 | $\text{CO}^* + \text{CHO}^* \rightarrow \text{CO-CHO}^* + ^*$                                                | -0.30 |
| 32 | $\text{CHO-CO}^* + \text{H}^+ + \text{e}^- \rightarrow \text{CHO-COH}^*$                                     | 0.70  |
| 33 | $\text{CHO-COH}^* + \text{H}^+ + \text{e}^- \rightarrow \text{C-CHO}^* + \text{H}_2\text{O}$                 | -1.51 |
| 34 | $\text{CHO-COH}^* + \text{H}^+ + \text{e}^- \rightarrow \text{CHO-CHOH}^*$                                   | -1.25 |
| 35 | $\text{C-CHO}^* + \text{H}^+ + \text{e}^- \rightarrow \text{CH-CHO}^*$                                       | 0.37  |
| 36 | $\text{CHO-CHOH}^* + \text{H}^+ + \text{e}^- \rightarrow \text{CH-CHO}^* + \text{H}_2\text{O}$               | 0.11  |
| 37 | $\text{CH-CHO}^* + \text{H}^+ + \text{e}^- \rightarrow \text{CH}_2\text{-CHO}^*$                             | -1.18 |
| 38 | $\text{CH-CHO}^* + \text{H}^+ + \text{e}^- \rightarrow \text{CH-CHOH}^*$                                     | -0.07 |
| 39 | $\text{CH}_2\text{-CHO} + \text{H}^+ + \text{e}^- \rightarrow \text{CH}_3\text{-CHO}^*$                      | -0.68 |
| 40 | $\text{CH}_2\text{-CHO} + \text{H}^+ + \text{e}^- \rightarrow \text{CH}_2\text{-CHOH}^*$                     | 1.52  |
| 41 | $\text{CH-CHOH}^* + \text{H}^+ + \text{e}^- \rightarrow \text{CH}_2\text{-CHOH}^*$                           | 0.41  |
| 42 | $\text{CH-CHOH}^* + \text{H}^+ + \text{e}^- \rightarrow \text{CH-CH}^* + \text{H}_2\text{O}$                 | 0.36  |
| 43 | $\text{CH}_3\text{-CHO}^* + \text{H}^+ + \text{e}^- \rightarrow \text{CH}_3\text{-CH}_2\text{O}^*$           | 1.19  |
| 44 | $\text{CH}_3\text{-CH}_2\text{O}^* + \text{H}^+ + \text{e}^- \rightarrow \text{CH}_3\text{-CH}_2\text{OH}^*$ | -1.43 |

|    |                                                                                                                           |       |
|----|---------------------------------------------------------------------------------------------------------------------------|-------|
| 45 | $\text{CH}_3\text{-CH}_2\text{OH}^* \rightarrow \text{CH}_3\text{-CH}_2\text{OH} + ^*$                                    | 0.10  |
| 46 | $\text{CH}_2\text{-CHOH}^* + \text{H}^+ + \text{e}^- \rightarrow \text{CH}_2\text{-CH}^* + \text{H}_2\text{O}$            | -1.50 |
| 47 | $\text{CH}_2\text{-CHOH}^* + \text{H}^+ + \text{e}^- \rightarrow \text{CH}_2\text{-CH}_2\text{OH}^*$                      | -1.04 |
| 48 | $\text{CH-CH}^* + \text{H}^+ + \text{e}^- \rightarrow \text{CH}_2\text{-CH}^*$                                            | -1.44 |
| 49 | $\text{CH}_2\text{-CH}^* + \text{H}^+ + \text{e}^- \rightarrow \text{CH}_2\text{-CH}_2^*$                                 | 0.58  |
| 50 | $\text{CH}_2\text{-CH}_2^* \rightarrow \text{CH}_2\text{-CH}_2 + ^*$                                                      | -1.44 |
| 51 | $\text{CH}_2\text{-CH}_2\text{OH}^* + \text{H}^+ + \text{e}^- \rightarrow \text{CH}_2\text{-CH}_2^* + \text{H}_2\text{O}$ | 0.12  |
| 52 | $\text{CH}_2\text{-CH}_2\text{OH}^* + \text{H}^+ + \text{e}^- \rightarrow \text{CH}_3\text{-CH}_2\text{OH}^*$             | -1.41 |
| 53 | $\text{CHO-CO}^* + \text{H}^+ + \text{e}^- \rightarrow \text{CHO-CHO}^*$                                                  | -0.60 |
| 54 | $\text{CHO-CHO}^* + \text{H}^+ + \text{e}^- \rightarrow \text{CHO-CHOH}^*$                                                | 0.05  |
| 55 | $\text{CHO-CHO}^* + \text{H}^+ + \text{e}^- \rightarrow \text{CHO-CH}_2\text{O}^*$                                        | 0.49  |
| 56 | $\text{CHO-CH}_2\text{O}^* + \text{H}^+ + \text{e}^- \rightarrow \text{CHO-CH}_2\text{OH}^*$                              | -0.85 |
| 57 | $\text{CHO-CHOH}^* + \text{H}^+ + \text{e}^- \rightarrow \text{CHO-CH}_2\text{OH}^*$                                      | -0.41 |
| 58 | $\text{CHO-CH}_2\text{OH}^* + \text{H}^+ + \text{e}^- \rightarrow \text{CH}_2\text{-CHO}^* + \text{H}_2\text{O}$          | -0.65 |
| 59 | $\text{CHO-COH}^* + \text{H}^+ + \text{e}^- \rightarrow \text{CHOH-COH}^*$                                                | -0.35 |
| 60 | $\text{CHOH-COH}^* + \text{H}^+ + \text{e}^- \rightarrow \text{CH-COH}^* + \text{H}_2\text{O}$                            | 0.37  |
| 61 | $\text{CH-COH}^* + \text{H}^+ + \text{e}^- \rightarrow \text{CH-C}^* + \text{H}_2\text{O}$                                | -0.44 |
| 62 | $\text{CH-COH}^* + \text{H}^+ + \text{e}^- \rightarrow \text{CH}_2\text{-COH}^*$                                          | -1.25 |
| 63 | $\text{CH-COH}^* + \text{H}^+ + \text{e}^- \rightarrow \text{CH-CHOH}^*$                                                  | -1.23 |
| 64 | $\text{CH-C}^* + \text{H}^+ + \text{e}^- \rightarrow \text{CH}_2\text{-C}^*$                                              | -0.72 |
| 65 | $\text{CH}_2\text{-COH}^* + \text{H}^+ + \text{e}^- \rightarrow \text{CH}_2\text{-C}^* + \text{H}_2\text{O}$              | 0.08  |
| 66 | $\text{CH}_2\text{-COH}^* + \text{H}^+ + \text{e}^- \rightarrow \text{CH}_2\text{-CHOH}^*$                                | 0.43  |
| 67 | $\text{CH-C}^* + \text{H}^+ + \text{e}^- \rightarrow \text{CH-CH}^*$                                                      | -0.43 |
| 68 | $\text{CH}_2\text{-C}^* + \text{H}^+ + \text{e}^- \rightarrow \text{CH}_2\text{-CH}^*$                                    | -1.44 |
| 69 | $\text{CH}_2\text{-C}^* + \text{H}^+ + \text{e}^- \rightarrow \text{CH}_3\text{-C}^*$                                     | 0.08  |
| 70 | $\text{CH}_3\text{-C}^* + \text{H}^+ + \text{e}^- \rightarrow \text{CH}_3\text{-CH}^*$                                    | -0.81 |
| 71 | $\text{CH}_3\text{-CH}^* + \text{H}^+ + \text{e}^- \rightarrow \text{CH}_3\text{-CH}_2^*$                                 | -1.25 |
| 72 | $\text{CH}_2\text{-CH}^* + \text{H}^+ + \text{e}^- \rightarrow \text{CH}_3\text{-CH}^*$                                   | 0.43  |
| 73 | $\text{CH}_2\text{-CH}_2^* + \text{H}^+ + \text{e}^- \rightarrow \text{CH}_3\text{-CH}_2^*$                               | -1.39 |
| 74 | $\text{CH}_3\text{-CH}_2\text{OH}^* + \text{H}^+ + \text{e}^- \rightarrow \text{CH}_3\text{-CH}_2^* + \text{H}_2\text{O}$ | 0.13  |
| 75 | $\text{CO}_2 + ^* \rightarrow \text{CO}_2^*$                                                                              | 0.32  |
| 76 | $\text{CH}_3\text{-CH}_2^* + \text{H}^+ + \text{e}^- \rightarrow \text{CH}_3\text{-CH}_3^*$                               | -1.30 |

|    |                                                                     |      |
|----|---------------------------------------------------------------------|------|
| 77 | $\text{CH}_3\text{-CH}_3^* \rightarrow \text{CH}_3\text{-CH}_3 + *$ | 0.26 |
|----|---------------------------------------------------------------------|------|

**Supplementary Table 3** Free energies for elementary steps for CO<sub>2</sub> electroreduction to (a) C<sub>1</sub> and (b) C<sub>2</sub> products on CuCuNC-4a. “\*” means the catalyst.

| Step Index | Reaction                                                                                          | Reaction Free Energy |
|------------|---------------------------------------------------------------------------------------------------|----------------------|
| 1          | $* + \text{CO}_2 + \text{H}^+ + \text{e}^- \rightarrow \text{COOH}^*$                             | 0.27                 |
| 2          | $\text{COOH}^* + \text{H}^+ + \text{e}^- \rightarrow \text{CO}^* + \text{H}_2\text{O}$            | 0.22                 |
| 3          | $\text{CO}^* \rightarrow \text{CO} + *$                                                           | -0.29                |
| 4          | $\text{CO}^* + \text{H}^+ + \text{e}^- \rightarrow \text{CHO}^*$                                  | -0.67                |
| 5          | $\text{CHO}^* + \text{H}^+ + \text{e}^- \rightarrow \text{CHOH}^*$                                | 0.51                 |
| 6          | $\text{CHOH}^* + \text{H}^+ + \text{e}^- \rightarrow \text{CH}^* + \text{H}_2\text{O}$            | 0.37                 |
| 7          | $\text{CHOH}^* + \text{H}^+ + \text{e}^- \rightarrow \text{CH}_2\text{OH}^*$                      | -0.22                |
| 8          | $\text{CH}^* + \text{H}^+ + \text{e}^- \rightarrow \text{CH}_2^*$                                 | -0.67                |
| 9          | $\text{CH}_2\text{OH}^* + \text{H}^+ + \text{e}^- \rightarrow \text{CH}_2^* + \text{H}_2\text{O}$ | -0.08                |
| 10         | $\text{CH}_2^* + \text{H}^+ + \text{e}^- \rightarrow \text{CH}_3^*$                               | -0.92                |
| 11         | $\text{CH}_3^* + \text{H}^+ + \text{e}^- \rightarrow \text{CH}_4 + *$                             | -0.48                |
| 12         | $\text{CO}^* + \text{H}^+ + \text{e}^- \rightarrow \text{COH}^*$                                  | 1.07                 |
| 13         | $\text{COH}^* + \text{H}^+ + \text{e}^- \rightarrow \text{C}^* + \text{H}_2\text{O}$              | -0.63                |
| 14         | $\text{C}^* + \text{H}^+ + \text{e}^- \rightarrow \text{CH}^*$                                    | -0.23                |
| 15         | $\text{COH}^* + \text{H}^+ + \text{e}^- \rightarrow \text{CHOH}^*$                                | -1.23                |
| 16         | $* + \text{CO}_2 + \text{H}^+ + \text{e}^- \rightarrow \text{OCHO}^*$                             | 0.54                 |
| 17         | $\text{OCHO}^* + \text{H}^+ + \text{e}^- \rightarrow \text{HCOOH}^*$                              | -0.16                |
| 18         | $\text{HCOOH}^* \rightarrow \text{HCOOH} + *$                                                     | -0.03                |
| 19         | $\text{OCHOH}^* + \text{H}^+ + \text{e}^- \rightarrow \text{CHO}^* + \text{H}_2\text{O}$          | -0.55                |
| 20         | $\text{CHO}^* + \text{H}^+ + \text{e}^- \rightarrow \text{CH}_2\text{O}^*$                        | 0.64                 |
| 21         | $\text{CH}_2\text{O}^* + \text{H}^+ + \text{e}^- \rightarrow \text{CH}_3\text{O}^*$               | 0.51                 |
| 22         | $\text{CH}_2\text{O}^* + \text{H}^+ + \text{e}^- \rightarrow \text{CH}_2\text{OH}^*$              | -0.34                |
| 23         | $\text{CH}_3\text{O}^* + \text{H}^+ + \text{e}^- \rightarrow \text{CH}_3\text{OH}^*$              | -1.11                |
| 24         | $\text{CH}_3\text{OH}^* \rightarrow \text{CH}_3\text{OH} + *$                                     | 0.05                 |
| 25         | $\text{CH}_2\text{OH}^* + \text{H}^+ + \text{e}^- \rightarrow \text{CH}_3\text{OH}^*$             | -0.26                |
| 26         | $\text{CH}_3\text{OH}^* + \text{H}^+ + \text{e}^- \rightarrow \text{OH}^* + \text{CH}_4$          | 0.29                 |
| 27         | $\text{OH}^* + \text{H}^+ + \text{e}^- \rightarrow \text{H}_2\text{O} + *$                        | -1.50                |

|    |                                                                                                                           |       |
|----|---------------------------------------------------------------------------------------------------------------------------|-------|
| 28 | $\text{CH}_3\text{O}^* + \text{H}^+ + \text{e}^- \rightarrow \text{O}^* + \text{CH}_4$                                    | 0.40  |
| 29 | $\text{O}^* + \text{H}^+ + \text{e}^- \rightarrow \text{OH}^*$                                                            | -1.22 |
| 30 | $\text{COOH}^* + \text{H}^+ + \text{e}^- \rightarrow \text{OCHOH}^*$                                                      | 0.10  |
| 31 | $\text{CH}_3^* + \text{H}^+ + \text{e}^- \rightarrow \text{CH}_4^*$                                                       | -0.63 |
| 32 | $\text{CH}_4^* \rightarrow \text{CH}_4 + ^*$                                                                              | 0.15  |
| 33 | $\text{OH}^* + \text{H}^+ + \text{e}^- \rightarrow \text{H}_2\text{O}^*$                                                  | -1.27 |
| 34 | $\text{H}_2\text{O}^* \rightarrow \text{H}_2\text{O} + ^*$                                                                | -0.23 |
| 35 | $2\text{CO}^* \rightarrow \text{CO-CO}^* + ^*$                                                                            | -1.02 |
| 36 | $\text{CO-CO}^* + \text{H}^+ + \text{e}^- \rightarrow \text{CO-CHO}^*$                                                    | 0.36  |
| 37 | $\text{CO-CHO}^* + \text{H}^+ + \text{e}^- \rightarrow \text{CHO-CHO}^*$                                                  | 0.40  |
| 38 | $\text{CO-CHO}^* + \text{H}^+ + \text{e}^- \rightarrow \text{CHO-COH}^*$                                                  | 0.19  |
| 39 | $\text{CHO-COH}^* + \text{H}^+ + \text{e}^- \rightarrow \text{C-CHO}^* + \text{H}_2\text{O}$                              | 0.67  |
| 40 | $\text{C-CHO}^* + \text{H}^+ + \text{e}^- \rightarrow \text{CH-CHO}^*$                                                    | -1.53 |
| 41 | $\text{CHO-COH}^* + \text{H}^+ + \text{e}^- \rightarrow \text{CHO-CHOH}^*$                                                | 0.06  |
| 42 | $\text{CHO-CHO}^* + \text{H}^+ + \text{e}^- \rightarrow \text{CHO-CHOH}^*$                                                | -0.15 |
| 43 | $\text{CHO-CHO}^* + \text{H}^+ + \text{e}^- \rightarrow \text{CHO-CH}_2\text{O}^*$                                        | 0.45  |
| 44 | $\text{CHO-CH}_2\text{O}^* + \text{H}^+ + \text{e}^- \rightarrow \text{CHO-CH}_2\text{OH}^*$                              | -0.79 |
| 45 | $\text{CHO-CHOH}^* + \text{H}^+ + \text{e}^- \rightarrow \text{CH-CHO}^* + \text{H}_2\text{O}$                            | -0.92 |
| 46 | $\text{CHO-CHOH}^* + \text{H}^+ + \text{e}^- \rightarrow \text{CHO-CH}_2\text{OH}^*$                                      | -0.19 |
| 47 | $\text{CH-CHO}^* + \text{H}^+ + \text{e}^- \rightarrow \text{CH}_2\text{-CHO}^*$                                          | 0.00  |
| 48 | $\text{CH-CHO}^* + \text{H}^+ + \text{e}^- \rightarrow \text{CH-CHOH}^*$                                                  | 0.11  |
| 49 | $\text{CHO-CH}_2\text{OH}^* + \text{H}^+ + \text{e}^- \rightarrow \text{CH}_2\text{-CHO}^* + \text{H}_2\text{O}$          | -0.74 |
| 50 | $\text{CH}_2\text{-CHO}^* + \text{H}^+ + \text{e}^- \rightarrow \text{CH}_2\text{-CHOH}^*$                                | -0.30 |
| 51 | $\text{CH-CHOH}^* + \text{H}^+ + \text{e}^- \rightarrow \text{CH}_2\text{-CHOH}^*$                                        | -0.41 |
| 52 | $\text{CH-CHOH}^* + \text{H}^+ + \text{e}^- \rightarrow \text{CH-CH}^* + \text{H}_2\text{O}$                              | -0.47 |
| 53 | $\text{CH-CH}^* + \text{H}^+ + \text{e}^- \rightarrow \text{CH}_2\text{-CH}^*$                                            | -0.52 |
| 54 | $\text{CH}_2\text{-CHOH}^* + \text{H}^+ + \text{e}^- \rightarrow \text{CH}_2\text{-CH}^* + \text{H}_2\text{O}$            | -0.57 |
| 55 | $\text{CH}_2\text{-CHOH}^* + \text{H}^+ + \text{e}^- \rightarrow \text{CH}_2\text{-CH}_2\text{OH}^*$                      | -0.09 |
| 56 | $\text{CH}_2\text{-CH}^* + \text{H}^+ + \text{e}^- \rightarrow \text{CH}_2\text{-CH}_2^*$                                 | -0.24 |
| 57 | $\text{CH}_2\text{-CH}_2^* \rightarrow \text{CH}_2\text{-CH}_2 + ^*$                                                      | 0.45  |
| 58 | $\text{CH}_2\text{-CH}_2\text{OH}^* + \text{H}^+ + \text{e}^- \rightarrow \text{CH}_2\text{-CH}_2^* + \text{H}_2\text{O}$ | -0.72 |
| 59 | $\text{CH}_2\text{-CH}_2\text{OH}^* + \text{H}^+ + \text{e}^- \rightarrow \text{CH}_3\text{-CH}_2\text{OH}^*$             | -0.46 |

|    |                                                                                                                           |       |
|----|---------------------------------------------------------------------------------------------------------------------------|-------|
| 60 | $\text{CH}_3\text{-CH}_2\text{OH}^* \rightarrow \text{CH}_3\text{-CH}_2\text{OH} + ^*$                                    | 0.19  |
| 61 | $\text{CO-COH}^* + \text{H}^+ + \text{e}^- \rightarrow \text{C-CO}^* + \text{H}_2\text{O}$                                | 0.50  |
| 62 | $\text{CO-COH}^* + \text{H}^+ + \text{e}^- \rightarrow \text{COH-COH}^*$                                                  | 1.09  |
| 63 | $\text{C-CO}^* + \text{H}^+ + \text{e}^- \rightarrow \text{CH-CO}^*$                                                      | -0.98 |
| 64 | $\text{C-CO}^* + \text{H}^+ + \text{e}^- \rightarrow \text{C-CHO}^*$                                                      | 0.22  |
| 65 | $\text{CH-CO}^* + \text{H}^+ + \text{e}^- \rightarrow \text{CH-COH}^*$                                                    | 0.61  |
| 66 | $\text{CH-CO}^* + \text{H}^+ + \text{e}^- \rightarrow \text{CH-CHO}^*$                                                    | -0.33 |
| 67 | $\text{COH-COH}^* + \text{H}^+ + \text{e}^- \rightarrow \text{CHOH-COH}^*$                                                | -0.82 |
| 68 | $\text{COH-COH}^* + \text{H}^+ + \text{e}^- \rightarrow \text{C-COH}^* + \text{H}_2\text{O}$                              | 0.04  |
| 69 | $\text{C-COH}^* + \text{H}^+ + \text{e}^- \rightarrow \text{CH-COH}^*$                                                    | -1.00 |
| 70 | $\text{CHO-COH}^* + \text{H}^+ + \text{e}^- \rightarrow \text{CHOH-COH}^*$                                                | -0.82 |
| 71 | $\text{CHOH-COH}^* + \text{H}^+ + \text{e}^- \rightarrow \text{CH-COH}^* + \text{H}_2\text{O}$                            | -0.14 |
| 72 | $\text{CH-COH} + \text{H}^+ + \text{e}^- \rightarrow \text{CH-CHOH}$                                                      | -0.83 |
| 73 | $\text{CH-COH} + \text{H}^+ + \text{e}^- \rightarrow \text{CH}_2\text{-COH}$                                              | -0.97 |
| 74 | $\text{CH-COH} + \text{H}^+ + \text{e}^- \rightarrow \text{CH-C}^* + \text{H}_2\text{O}$                                  | -0.27 |
| 75 | $\text{CH-C}^* + \text{H}^+ + \text{e}^- \rightarrow \text{CH-CH}^*$                                                      | -1.02 |
| 76 | $\text{CH-C}^* + \text{H}^+ + \text{e}^- \rightarrow \text{CH}_2\text{-C}^*$                                              | -0.53 |
| 77 | $\text{CH}_2\text{-CHO}^* + \text{H}^+ + \text{e}^- \rightarrow \text{CH}_3\text{-CHO}^*$                                 | -0.64 |
| 78 | $\text{CH}_2\text{-COH}^* + \text{H}^+ + \text{e}^- \rightarrow \text{CH}_2\text{-C}^* + \text{H}_2\text{O}$              | 0.16  |
| 79 | $\text{CH}_2\text{-COH}^* + \text{H}^+ + \text{e}^- \rightarrow \text{CH}_2\text{-CHOH}^*$                                | -0.28 |
| 80 | $\text{CH}_2\text{-C}^* + \text{H}^+ + \text{e}^- \rightarrow \text{CH}_2\text{-CH}^*$                                    | -1.01 |
| 81 | $\text{CH}_3\text{-CHO}^* + \text{H}^+ + \text{e}^- \rightarrow \text{CH}_3\text{-CH}_2\text{O}^*$                        | 1.07  |
| 82 | $\text{CH}_3\text{-CH}_2\text{O}^* + \text{H}^+ + \text{e}^- \rightarrow \text{CH}_3\text{-CH}_2\text{OH}^*$              | -1.28 |
| 83 | $\text{CH}_2\text{-C}^* + \text{H}^+ + \text{e}^- \rightarrow \text{CH}_3\text{-C}^*$                                     | -0.17 |
| 84 | $\text{CH}_3\text{-C}^* + \text{H}^+ + \text{e}^- \rightarrow \text{CH}_3\text{-CH}^*$                                    | -1.11 |
| 85 | $\text{CH}_3\text{-CH}^* + \text{H}^+ + \text{e}^- \rightarrow \text{CH}_3\text{-CH}_2^*$                                 | -0.47 |
| 86 | $\text{CH}_2\text{-CH}^* + \text{H}^+ + \text{e}^- \rightarrow \text{CH}_3\text{-CH}^*$                                   | -0.27 |
| 87 | $\text{CH}_2\text{-CH}_2^* + \text{H}^+ + \text{e}^- \rightarrow \text{CH}_3\text{-CH}_2^*$                               | -0.50 |
| 88 | $\text{CH}_3\text{-CH}_2\text{OH}^* + \text{H}^+ + \text{e}^- \rightarrow \text{CH}_3\text{-CH}_2^* + \text{H}_2\text{O}$ | -0.77 |
| 89 | $\text{CO}_2 + ^* \rightarrow \text{CO}_2^*$                                                                              | 0.18  |
| 90 | $\text{CH}_3\text{-CH}_2^* + \text{H}^+ + \text{e}^- \rightarrow \text{CH}_3\text{-CH}_3^*$                               | -0.51 |
| 91 | $\text{CH}_3\text{-CH}_3^* \rightarrow \text{CH}_3\text{-CH}_3 + ^*$                                                      | 0.47  |



**Supplementary Table 3** Bond center of Cu, N and C atoms in CuNC-4-pyridine and CuCuNC-4a with and without adsorbed COOH.

| Bond center (eV) | CuNC-4-pyridine | CuNC-4-pyridine-COOH | CuCuNC-4a | CuCuNC-4a-COOH |
|------------------|-----------------|----------------------|-----------|----------------|
| <b>Cu1-3d</b>    | -3.2            | -2.3                 | -3.1      | -3.0           |
| <b>Cu2-3d</b>    | -               | -                    | -3.1      | -3.1           |
| <b>N1-2p</b>     | -3.8            | -3.4                 | -3.9      | -3.9           |
| <b>N2-2p</b>     | -3.8            | -3.5                 | -2.8      | -3.2           |
| <b>N3-2p</b>     | -3.8            | -3.4                 | -3.9      | -3.9           |
| <b>N4-2p</b>     | -3.8            | -3.4                 | -3.9      | -3.9           |
| <b>N5-2p</b>     | -               | -                    | -2.8      | -3.3           |
| <b>N6-2p</b>     | -               | -                    | -3.9      | -3.9           |
| <b>C-2p</b>      | -               | -2.5                 | -         | -2.2           |

**Supplementary Table 4** The adsorption energy and ICOHP with COOH adsorbed on CuNC-4-pyridine and CuCuNC-4a.

| System                 | $\Delta E_{\text{ads-COOH}}$ (eV) | ICOHP     |
|------------------------|-----------------------------------|-----------|
| <b>CuNC-4-pyridine</b> | 1.39059411                        | -2.17368  |
| <b>CuCuNC-4a</b>       | 0.27265554                        | -11.04964 |
